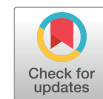

# Erratum

**Erratum. Associations Between Exposure to Gestational Diabetes Mellitus In Utero and Daily Energy Intake, Brain Responses to Food Cues, and Adiposity in Children. Diabetes Care 2021;44:1185–1193**

*Shan Luo, Brendan C. Angelo, Ting Chow, John R. Monterosso, Paul M. Thompson, Anny H. Xiang, and Kathleen A. Page*

<https://doi.org/10.2337/dc21-er10>

In Table 1 of the above-cited article, data for GDM-exposed and unexposed children for characteristics daily energy intake (EI), moderate to vigorous physical activity (MVPA), and orbital frontal cortex (OFC) food cue reactivity were inadvertently transposed. For GDM-exposed children, the correct data are  $1,805.9 \pm 391.83$  (EI),  $146.69 \pm 96.61$  (MVPA), and  $0.05 \pm 0.15$  (PFC). For unexposed children, the correct data are  $1,664.2 \pm 367.23$  (EI),  $136.23 \pm 98.21$  (MVPA), and  $-0.004 \pm 0.15$  (PFC).

The authors apologize for the error.

The online version of the article (<https://doi.org/10.2337/dc20-3006>) has been updated to correct the data.
